# Supplementary material for: Heterogeneous Nb-containing catalyst/N,N-dimethylacetamide–salt mixtures: novel and efficient catalytic systems for the dehydration of fructose
Source: Royal Society of Chemistry journal article supplement (doi:10.1039/c6ra09664f), 2016-01-01
Supplement: c6ra09664f1.pdf [file c6ra09664f1.pdf]

## Supporting Information

### Heterogeneous Nb-containing catalyst/N,N-dimethylacetamide-salts mixtures: Novel and efficient catalytic systems for dehydration of fructose

Zhimin Xue,<sup>\*a</sup> Bobo Cao,<sup>b</sup> Wancheng Zhao,<sup>c</sup> Jinfang Wang,<sup>c</sup> Tingting Yu<sup>c</sup> and Tiancheng Mu<sup>\*c</sup>

<sup>a</sup> Beijing Key Laboratory of Lignocellulosic Chemistry, College of Materials Science and Technology, Beijing Forestry University, Beijing 100083, P. R. China. Email: [zmxue@bjfu.edu.cn](mailto:zmxue@bjfu.edu.cn)

<sup>b</sup> School of Chemistry and Chemical Engineering, Qufu Normal University, Qufu 273165, P. R. China.

<sup>c</sup> Department of Chemistry, Renmin University of China, Beijing 100872, P. R. China. Email: [tcmu@ruc.edu.cn](mailto:tcmu@ruc.edu.cn); Tel: 86-10-62514925

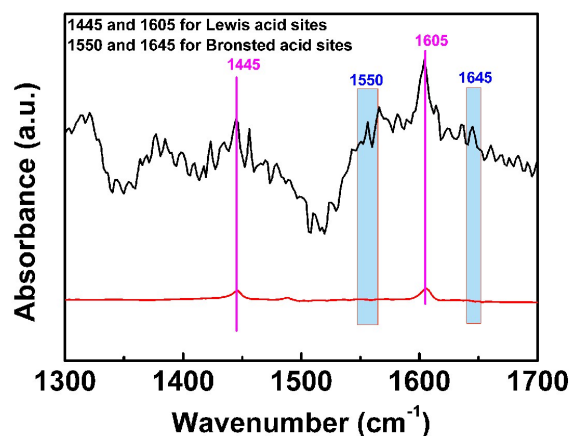

**Fig. S1.** Pyridine adsorption FT-IR analysis of Nb-NTMPA and Nb<sub>2</sub>O<sub>5</sub>, which were determined by pyridine FT-IR on the Nicolet NEXUS 670 FT-IR spectrometer with a resolution of 2 cm<sup>-1</sup>. The samples were finely ground and pressed into a self-supporting wafer (diameter 15 mm, 42 mg). The wafers were evacuated in the IR cell at 150 °C for 1 h under a vacuum in order to remove physisorbed water. After the temperature decreased to room temperature, IR spectra were recorded in the range from 2500 to 1000 cm<sup>-1</sup>. Subsequently, the samples were followed by the adsorption of purified pyridine vapor at room temperature for 50 min. The pyridine adsorption IR spectra were recorded after subsequent evacuation of the infrared cell at 200 °C. The spectra presented were obtained by subtracting the spectra recorded before and after pyridine adsorption. The quantity of Lewis and Brønsted acid sites was evaluated according to the equation in the literature (*J. Catal.*, 1993, 141, 347-354):

$$C(\text{pyridine on Lewis sites})=1.42I_A(L)R^2/W$$

$$C(\text{pyridine on Brønsted sites})=1.88I_A(B)R^2/W$$

In the equation, C=concentration (mmol/g catalyst); I<sub>A</sub>(L or B)=integrated absorbance of Lewis or Brønsted acid band (cm<sup>-1</sup>); R=radius of catalyst disk (cm); W=weight of disk (mg).

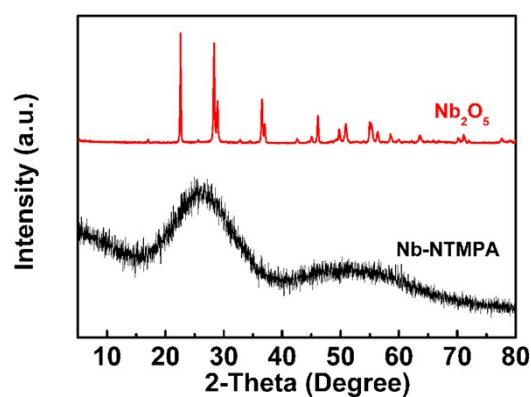

**Fig. S2.** XRD patterns of Nb-NTMPA and Nb<sub>2</sub>O<sub>5</sub>.

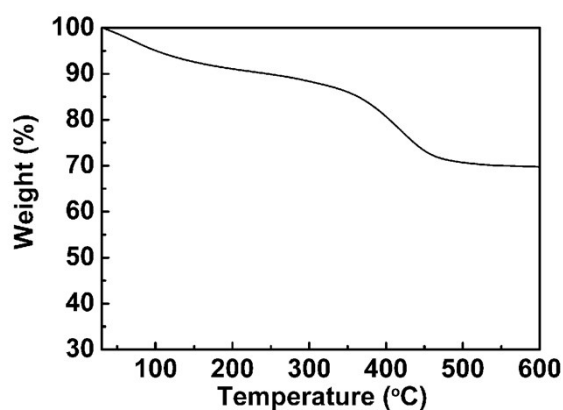

**Fig. S3.** The thermogravimetric analysis of Nb-NTMPA. The weight loss (about 5%) up to 150 °C is attributable to the loss of intercalated and adsorbed water and ethanol molecules in the sample. The obvious weight loss (about 20%) occurred between 350 °C and 450 °C corresponds to the burning of organic fragments of the hybrid framework.

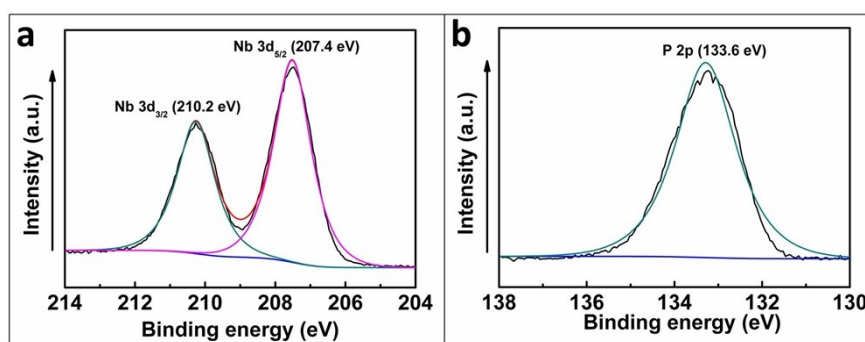

**Fig. S4.** XPS spectra of Nb 3d (a) and P 2p (b) for the recovered Nb-NTMPA after reused three times.

**Table S1.** *n*-Butylamine titration method using various Hammett indicators for the acid strength and amounts, which was similar with the reported route (*Carbohydr. Res.*, 2013, 368, 78).<sup>a</sup>

| Sample                         | Weak and medium strong acid | Strong acid                 | Very strong acid       | Total acid  |
|--------------------------------|-----------------------------|-----------------------------|------------------------|-------------|
|                                | (-3.0≤H <sub>0</sub> ≤6.8)  | (-8.2≤H <sub>0</sub> ≤-3.0) | (H <sub>0</sub> ≤-8.2) |             |
| Nb-NTMPA                       | 0.18 mmol/g                 | 0.06 mmol/g                 | 0                      | 0.24 mmol/g |
| Nb <sub>2</sub> O <sub>5</sub> | 0.07 mmol/g                 | 0                           | 0                      | 0.07 mmol/g |

<sup>a</sup>The Hammett indicators included anthraquinone (pK<sub>a</sub>=-8.2), chalcone (pK<sub>a</sub>=-5.6), dicinnamalacetone (pK<sub>a</sub>=-3.0), methyl yellow (pK<sub>a</sub>=3.3), and neutral red (pK<sub>a</sub>=6.8). Before the examination, 0.1 g samples were pretreated at 120 °C for 12 h in the atmosphere of He.

**Table S2.** Properties of the prepared Nb-NTMPA.

| Entry          | Sample <sup>a</sup> | BET surface area (m <sup>2</sup> /g) <sup>b</sup> | Pore volume (cm <sup>3</sup> /g) <sup>c</sup> | Pore diameter (nm) <sup>d</sup> |
|----------------|---------------------|---------------------------------------------------|-----------------------------------------------|---------------------------------|
| 1              | Nb-NTMPA            | 25.2                                              | 0.14                                          | 5.5                             |
| 2 <sup>e</sup> | Nb-NTMPA            | 20.7                                              | 0.12                                          | 4.7                             |

<sup>a</sup>The samples were degassed at 100 °C for 24 h. <sup>b</sup>Surface area based on multipoint BET method. <sup>c</sup>Pore volume based on BJH method. <sup>d</sup>Pore diameter based on BJH method. <sup>e</sup>The Nb-TPMA was the recovered one after reused for three times.

**Table S3.** The contents of various elements on the surface of Nb-NTMPA determined by XPS examination.

| Element | Content of various elements on the surface (Atomic%) <sup>a</sup> |                |
|---------|-------------------------------------------------------------------|----------------|
|         | Fresh Nb-NTMPA                                                    | Spent Nb-NTMPA |
| Nb      | 4.51                                                              | 4.35           |
| N       | 6.24                                                              | 5.97           |
| P       | 9.31                                                              | 9.72           |
| O       | 37.27                                                             | 39.05          |
| C       | 42.67                                                             | 40.91          |
